# Supplementary material
Source: PubMed Central journal article supplement (PMC2889601)
Supplement: supp_137.14.2279_DEV050427tableS1.pdf [file supp_137.14.2279_DEV050427tableS1.pdf]

**Table S1. Chimaera generation from 2i-LIF-derived mouse EG cells**

| Mouse EG cell clone | Passage number | Sex    | Blastocysts injected | Number born | Number of chimaeras | Germline transmission |
|---------------------|----------------|--------|----------------------|-------------|---------------------|-----------------------|
| SLD21               | 6              | Male   | 64                   | 5           | 3                   | 2                     |
| SLD23               | 6              | Female | 52                   | 19          | 5                   | ND                    |
